# Supplementary material
Source: Springer Nature journal article supplement (https://www.springermedizin.de/resource/supplementary/13024_2014_560_MOESM6_ESM.pdf/9644392)

WT Hipp

Tau<sup>-/-</sup> Hipp

WT cortex

Tau<sup>-/-</sup> cortex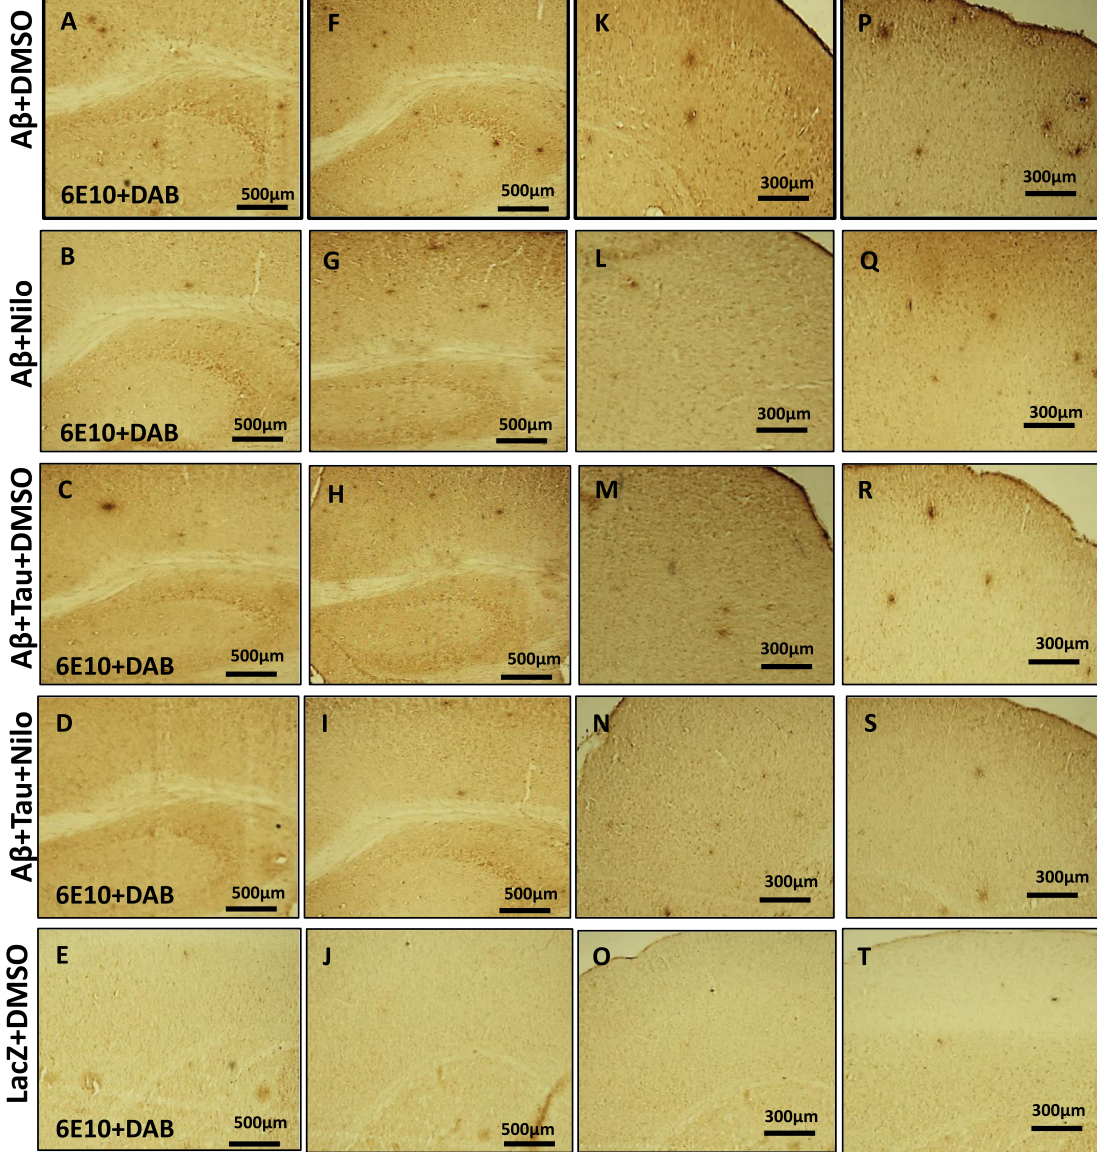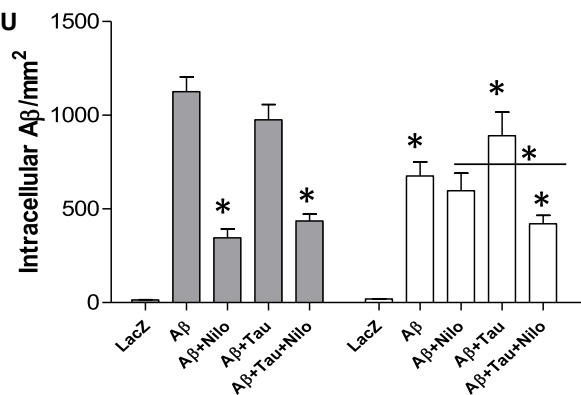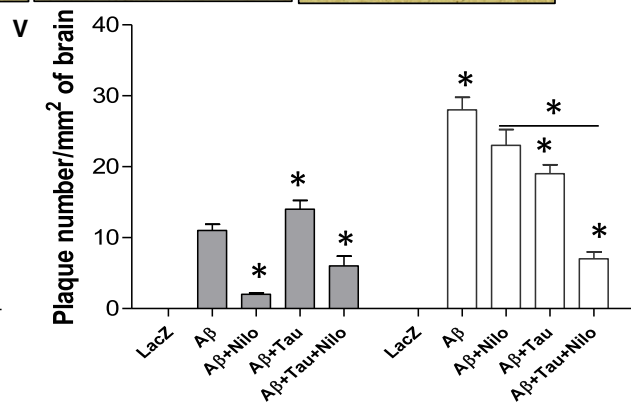

Supplement: MOESM6 [file 9644392]
